# Supplementary material for: A novel fluorescent nanoprobe based on DNA silver nanoclusters for the detection of DEQ
Source: Royal Society of Chemistry journal article supplement (doi:10.1039/d5ra04006j), 2025-01-01
Supplement: d5ra04006j1.pdf [file d5ra04006j1.pdf]

## Electronic Supplementary Information

### **A novel fluorescence nanoprobe based on DNA silver nanoclusters for the detection of DEQ**

Yuxia Li\*, Xingxing Liu, Baozhu Zhang\*, Fengtao Gao

Department of Chemistry and Chemical Engineering, Jinzhong University, Yuci 030619, P. R. China

\*Corresponding author.

E-mail address: zhangbaozhu518@126.com; yxli\_2004@163.com

**Table S1** Names and sequences of the oligonucleotides.

| Oligonucleotides | Sequences (5' - 3') |
|------------------|---------------------|
| D-DNA            | CCCTCCCTCCCC        |
| D1-DNA           | CGAACCCTCCCTCCCC    |

**Table S2** The lifetimes of D-DNA-Ag NCs in the absence and presence of different concentration of DEQ.

| Samples | [DEQ] ( $\mu\text{M}$ ) | $\tau$ (ns) | $\chi^2$ |
|---------|-------------------------|-------------|----------|
| 1       | 0                       | 3.52        | 1.2835   |
| 2       | 40                      | 3.61        | 1.2832   |
| 3       | 80                      | 5.09        | 1.2928   |

**Table S3** The detection methods and LOD of some of cationic surfactants

| Surfactant                     | Method     | Limit of detection               | Reference |
|--------------------------------|------------|----------------------------------|-----------|
| Cetyltrimethylammonium bromide | DNA-Ag NCs | $4.7 \times 10^{-5}$ mg/L        | 20        |
| Ditallowdimethylammonium       | HPLC       | 15–80 mg/kg                      | 34        |
| Alkylbenzylammonium salts      | HPLC       | 50 mg/L                          | 35        |
| DEQ                            | DNA-Ag NCs | 2.0 $\mu\text{M}$<br>(0.72 mg/L) | This work |

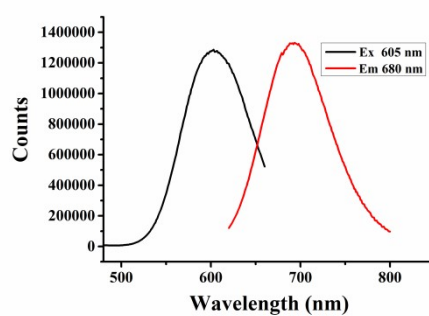**Fig. S1** the excitation and emission spectra of D1-DNA- AgNCs.

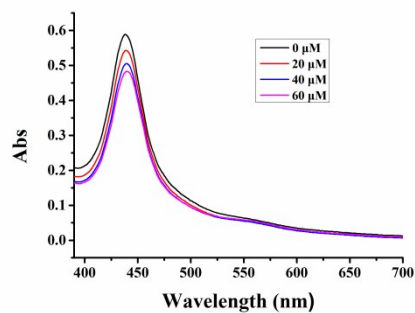

**Fig. S2** UV-Vis absorption spectra of D-DNA-Ag NCs in the absence and presence of DEQ

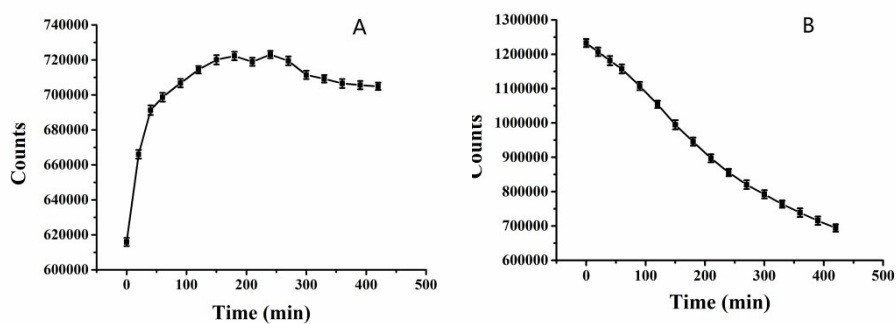

**Fig. S3** The change of fluorescence intensity of D-DNA-Ag NCs (A), D1-DNA-Ag NCs (B) against the increasing time. Error bars represent the standard deviation of three independent measurements.  $c(\text{DNA}) = 3.0 \mu\text{M}$ .

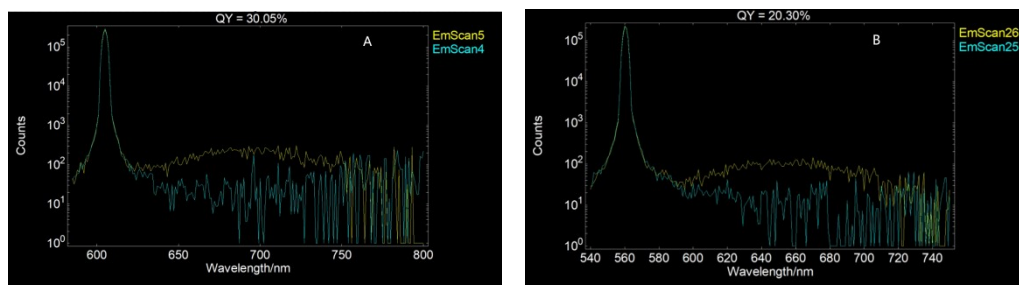

**Fig. S4** The quantum yields (QY) of D-DNA-AgNCs ( $\lambda_{\text{ex}}=560\text{nm}$ , integrated wavelength range: 540-750 nm) (A), D1-DNA-AgNCs ( $\lambda_{\text{ex}}=605\text{nm}$ , integrated wavelength range: 585-800 nm) (B).

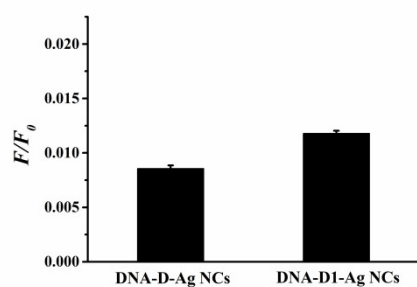

**Fig. S5** The relative fluorescence intensity ( $F/F_0$ ) of different DNA-AgNCs.  $F_0$  and  $F$  are the emission intensity of the DNA-Ag NCs before and after the addition of 110  $\mu\text{M}$  DEQ, respectively. The error bars represent the standard deviation of three independent measurements.

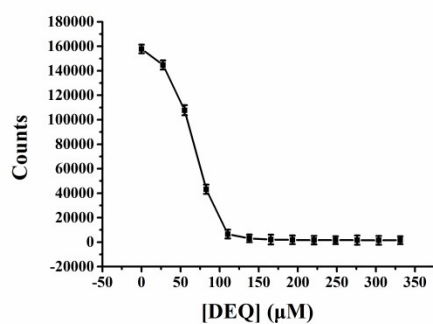

**Fig. S6** The change of fluorescence intensity of D-DNA-Ag NCs against the increasing DEQ concentration.

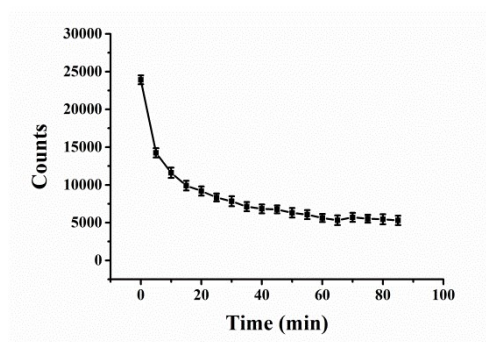

**Fig. S7** The fluorescence intensity of D-DNA-Ag NCs with 100  $\mu\text{M}$  DEQ against the reaction time.

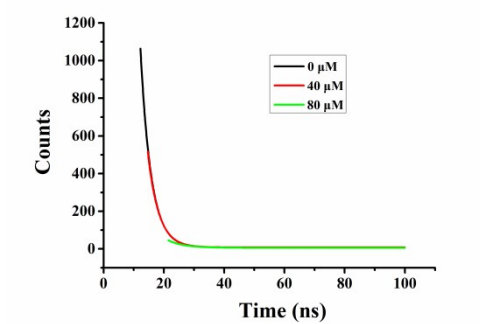

**Fig. S8** The fluorescence lifetimes of D-DNA-Ag NCs (excitation at 560 nm and emission at 650 nm) in the absence and presence of DEQ.

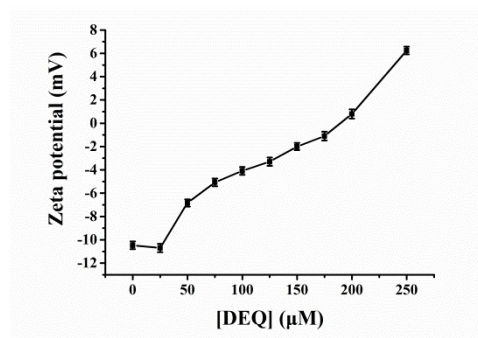

**Fig. S9** The change of the zeta potential of D-DNA-Ag NCs against the increasing DEQ concentration.
